# Supplementary material
Source: PubMed Central journal article supplement (PMC10398544)
Supplement: jamadermatol-e232352-s002.pdf [file jamadermatol-e232352-s002.pdf]

## Supplemental Online Content

Yang YW, Yiannias JA, Voss MM, et al. Systematic Identification of Copositivity Groups in Standard Series Patch Testing Through Hierarchical Clustering. *JAMA Dermatol*. Published online August 2, 2023. doi:10.1001/jamadermatol.2023.2352

**eFigure 1.**

**eFigure 2.** CAB-CF Copositivity Rate

**eTable 2.** Mayo Clinic Standard Series Patch Test Results 2012-2021

This supplemental material has been provided by the authors to give readers additional information about their work.

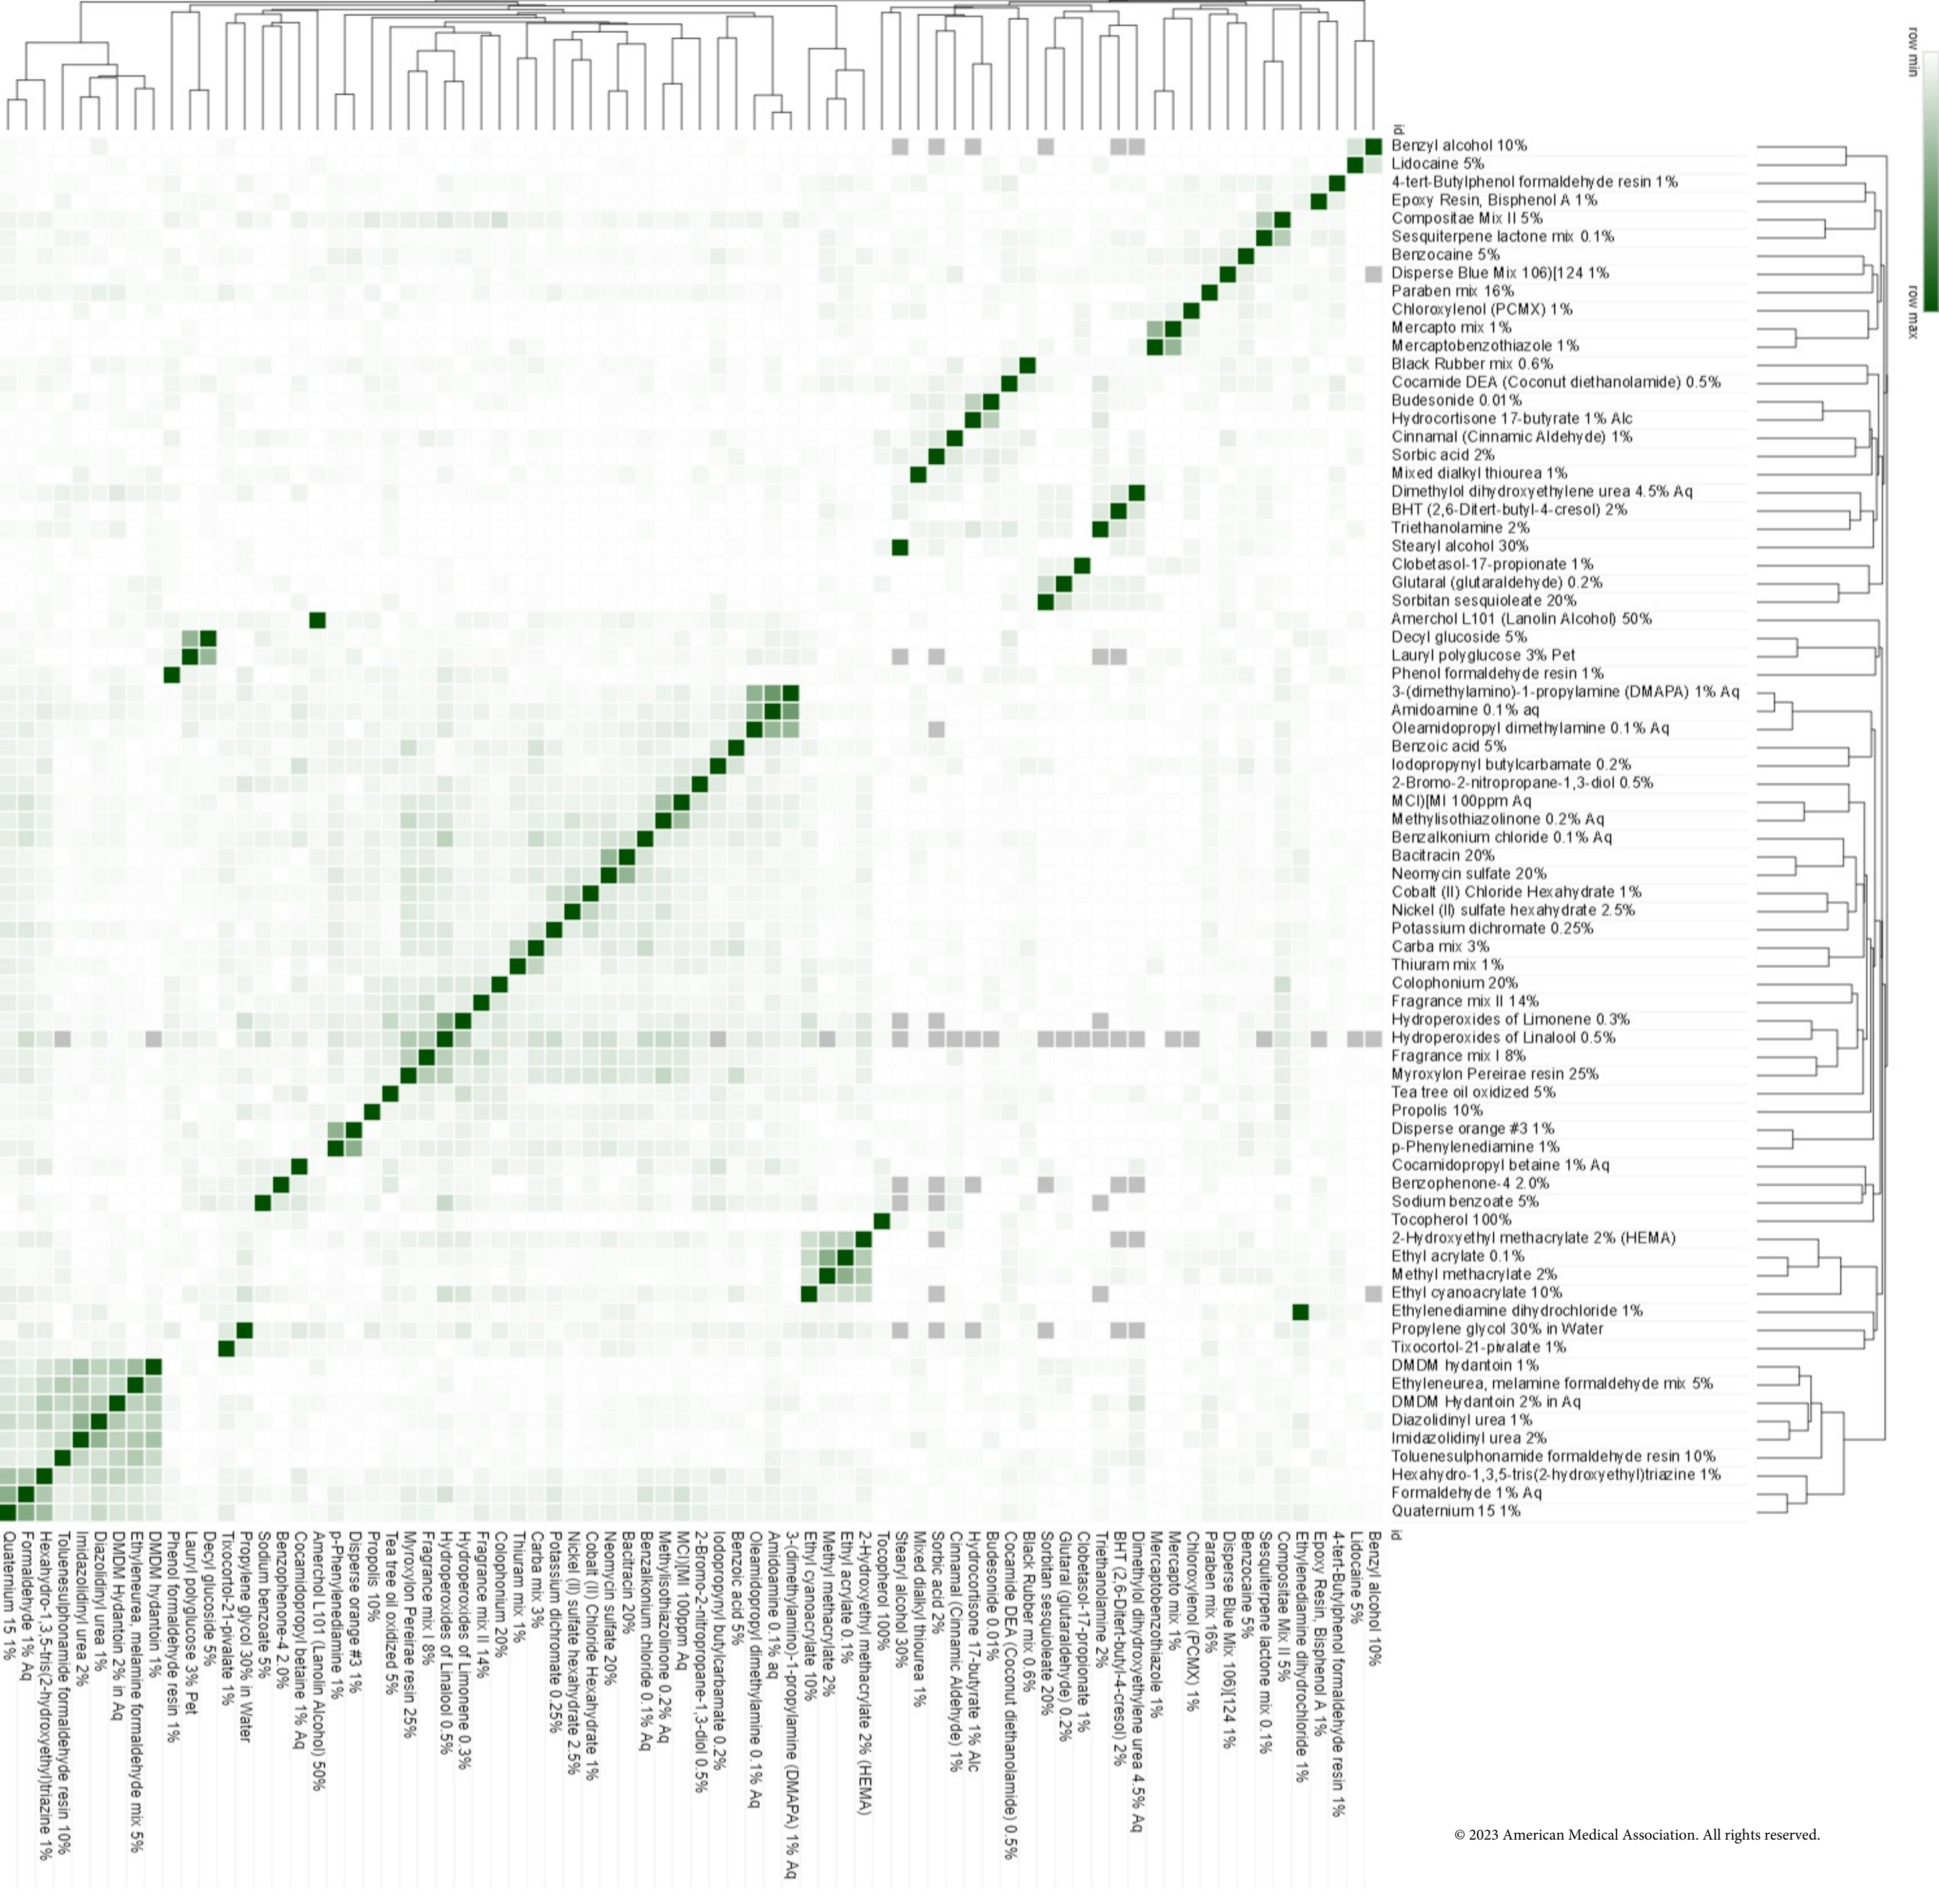

Number of patients positive to methyl methacrylate and tested against nickel: 63

Number of patients positive to both methyl methacrylate and nickel: 21

Co-positivity Rate:  $\frac{21}{63} = 33.33\%$

Nickel positivity: 17.5%

Methyl methacrylate positivity: 1.17%

Contact Allergen Background Correction Factor (CAB-CF) :  $\frac{17.5}{1.17} = 14.96$

CAB-CF Co-positivity (background corrected co-positivity rate):  $\frac{\text{Co-positivity Rate}}{\text{CAB-CF}} = \frac{33.33\%}{14.96} = 2.23\%$

| Allergen                                      | Total | Positive | Positive % |
|-----------------------------------------------|-------|----------|------------|
| 2-Bromo-2-nitropropane-1,3-diol 0.5%          | 5300  | 162      | 3.06%      |
| 2-Hydroxyethyl methacrylate 2% (HEMA)         | 3461  | 141      | 4.07%      |
| 3-(dimethylamino)-1-propylamine (DMAPA) 1% Aq | 4013  | 98       | 2.44%      |
| 4-tert-Butylphenol formaldehyde resin 1%      | 5462  | 37       | 0.68%      |
| Amerchol L101 (Lanolin Alcohol) 50%           | 3863  | 63       | 1.63%      |
| Amidoamine 0.1% aq                            | 5367  | 132      | 2.46%      |
| Bacitracin 20%                                | 5463  | 326      | 5.97%      |
| Benzalkonium chloride 0.1% Aq                 | 5301  | 326      | 6.15%      |
| Benzocaine 5%                                 | 5678  | 71       | 1.25%      |
| Benzoic acid 5%                               | 5537  | 183      | 3.31%      |
| Benzophenone-4 2.0%                           | 1920  | 25       | 1.30%      |
| Benzyl alcohol 10%                            | 2038  | 8        | 0.39%      |
| BHT (2,6-Ditert-butyl-4-cresol) 2%            | 5302  | 8        | 0.15%      |
| Black Rubber mix 0.6%                         | 5292  | 46       | 0.87%      |
| Budesonide 0.01%                              | 5481  | 32       | 0.58%      |
| Carba mix 3%                                  | 5461  | 260      | 4.76%      |
| Cetyl Alcohol 5%                              | 5301  | 3        | 0.06%      |
| Chloroxylenol (PCMX) 1%                       | 5410  | 23       | 0.43%      |
| Cinnamal (Cinnamic Aldehyde) 1%               | 5367  | 41       | 0.76%      |
| Clobetasol-17-propionate 1%                   | 5330  | 15       | 0.28%      |
| Cobalt (II) Chloride Hexahydrate 1%           | 5849  | 476      | 8.14%      |
| Cocamide DEA (Coconut diethanolamide) 0.5%    | 5316  | 37       | 0.70%      |
| Cocamidopropyl betaine 1% Aq                  | 5475  | 96       | 1.75%      |
| Colophonium 20%                               | 5677  | 133      | 2.34%      |
| Compositae Mix II 5%                          | 5470  | 112      | 2.05%      |
| Decyl glucoside 5%                            | 3711  | 50       | 1.35%      |
| Desoximetasone 1%                             | 3671  | 4        | 0.11%      |

|                                                 |      |     |        |
|-------------------------------------------------|------|-----|--------|
| Diazolidinyl urea 1%                            | 5468 | 64  | 1.17%  |
| Dimethylol dihydroxyethylene urea 4.5% Aq       | 5305 | 15  | 0.28%  |
| Disperse Blue Mix 106/124 1%                    | 4219 | 37  | 0.88%  |
| Disperse orange #3 1%                           | 4235 | 98  | 2.31%  |
| DMDM hydantoin 1%                               | 5302 | 35  | 0.66%  |
| DMDM Hydantoin 2% in Aq                         | 5303 | 44  | 0.83%  |
| Epoxy Resin, Bisphenol A 1%                     | 5609 | 38  | 0.68%  |
| Ethyl acrylate 0.1%                             | 5721 | 78  | 1.36%  |
| Ethyl cyanoacrylate 10%                         | 3699 | 97  | 2.62%  |
| Ethylenediamine dihydrochloride 1%              | 5495 | 74  | 1.35%  |
| Ethyleneurea, melamine formaldehyde mix 5%      | 5306 | 35  | 0.66%  |
| Formaldehyde 1% Aq                              | 5473 | 231 | 4.22%  |
| Fragrance mix I 8%                              | 5677 | 361 | 6.36%  |
| Fragrance mix II 14%                            | 5465 | 156 | 2.85%  |
| Glutaral (glutaraldehyde) 0.2%                  | 5508 | 15  | 0.27%  |
| Hexahydro-1,3,5-tris(2-hydroxyethyl)triazine 1% | 5302 | 110 | 2.07%  |
| Hydrocortisone 17-butyrate 1% Alc               | 5327 | 13  | 0.24%  |
| Hydroperoxides of Limonene 0.3%                 | 3488 | 132 | 3.78%  |
| Hydroperoxides of Linalool 0.5%                 | 782  | 67  | 8.57%  |
| Imidazolidinyl urea 2%                          | 5468 | 44  | 0.80%  |
| Iodopropynyl butylcarbamate 0.2%                | 5485 | 123 | 2.24%  |
| Lauryl polyglucose 3% Pet                       | 2786 | 36  | 1.29%  |
| Lidocaine 5%                                    | 5514 | 24  | 0.44%  |
| MCI/MI 100ppm Aq                                | 5452 | 311 | 5.70%  |
| Mercapto mix 1%                                 | 5462 | 16  | 0.29%  |
| Mercaptobenzothiazole 1%                        | 5478 | 23  | 0.42%  |
| Methyl methacrylate 2%                          | 5795 | 68  | 1.17%  |
| Methylisothiazolinone 0.2% Aq                   | 4295 | 526 | 12.25% |

|                                            |      |      |        |
|--------------------------------------------|------|------|--------|
| Mixed dialkyl thiourea 1%                  | 5300 | 38   | 0.72%  |
| Myroxylon Pereirae resin 25%               | 5684 | 573  | 10.08% |
| Neomycin sulfate 20%                       | 5463 | 422  | 7.72%  |
| Nickel (II) sulfate hexahydrate 2.5%       | 5862 | 1026 | 17.50% |
| Oleamidopropyl dimethylamine 0.1% Aq       | 3365 | 123  | 3.66%  |
| p-Phenylenediamine 1%                      | 5469 | 253  | 4.63%  |
| Paraben mix 16%                            | 5462 | 84   | 1.54%  |
| Phenol formaldehyde resin 1%               | 5333 | 44   | 0.83%  |
| Phenoxyethanol 1%                          | 1777 | 2    | 0.11%  |
| Potassium dichromate 0.25%                 | 5668 | 285  | 5.03%  |
| Propolis 10%                               | 5288 | 136  | 2.57%  |
| Propylene glycol 30% in Water              | 1971 | 39   | 1.98%  |
| Quaternium 15 1%                           | 5471 | 177  | 3.24%  |
| Sesquiterpene lactone mix 0.1%             | 5496 | 41   | 0.75%  |
| Sodium benzoate 5%                         | 3486 | 67   | 1.92%  |
| Sorbic acid 2%                             | 5492 | 14   | 0.25%  |
| Sorbitan sesquioleate 20%                  | 5278 | 16   | 0.30%  |
| Stearyl alcohol 30%                        | 5301 | 13   | 0.25%  |
| Tea tree oil oxidized 5%                   | 5052 | 78   | 1.54%  |
| Thiuram mix 1%                             | 5462 | 152  | 2.78%  |
| Tixocortol-21-pivalate 1%                  | 5688 | 101  | 1.78%  |
| Tocopherol 100%                            | 5300 | 22   | 0.42%  |
| Toluenesulphonamide formaldehyde resin 10% | 5325 | 40   | 0.75%  |
| Triamcinolone Acetonide 1%                 | 5691 | 4    | 0.07%  |
| Triethanolamine 2%                         | 5302 | 16   | 0.30%  |

Table S2: Mayo Clinic Standard Series Patch Test Results 2012-2021
