# Supplementary material
Source: PubMed Central journal article supplement (PMC10398544)
Supplement: jamadermatol-e232352-s003.pdf [file jamadermatol-e232352-s003.pdf]

## Data Sharing Statement

Yang. Systematic Identification of Copositivity Groups in Standard Series Patch Testing Through Hierarchical Clustering. *JAMA Dermatol.* Published August 02, 2023.  
doi:10.1001/jamadermatol.2023.2352

### Data

**Data available:** Yes

**Data types:** Data (not involving human participants)

**How to access data:** Table 1, Table S1

**When available:** With publication

### Supporting Documents

**Document types:** None

### Additional Information

**Who can access the data:** Anyone requesting the data

**Types of analyses:** For any purpose

**Mechanisms of data availability:** Online/with publication
